# Supplementary material for: Particulate Matter (PM2.5) from Biomass Combustion Induces an Anti-Oxidative Response and Cancer Drug Resistance in Human Bronchial Epithelial BEAS-2B Cells
Source: PubMed Central journal article supplement (PMC7664250; doi:10.3390/ijerph17218193), 2020-11-06
Supplement: ijerph-17-08193-s001.pdf [file ijerph-17-08193-s001.pdf]

## Supporting Information

**Particulate matter (PM<sub>2.5</sub>) from biomass combustion induces an anti-oxidative response and cancer drug resistance in human bronchial epithelial BEAS-2B cells**

International Journal of Environmental Research and Public Health

Regina Merk<sup>1</sup>, Katharina Heßelbach<sup>1</sup>, Anastasiya Osipova<sup>1</sup>, Désirée Popadić<sup>1</sup>, Wolfgang Schmidt-Heck<sup>2</sup>, Gwang-Jin Kim<sup>3</sup>, Stefan Günther<sup>3</sup>, Alfonso García Piñeres<sup>4,5</sup>, Irmgard Merfort<sup>1,6,†‡</sup> and Matjaz Humar<sup>1,†‡</sup>

<sup>1</sup> Pharmaceutical Biology and Biotechnology, Institute of Pharmaceutical Sciences, Albert-Ludwigs University Freiburg, Freiburg, Germany

<sup>2</sup> Leibniz Institute for Natural Product Research and Infection Biology - Hans-Knöll-Institute (HKI), Jena, Germany

<sup>3</sup> Pharmaceutical Bioinformatics, Institute of Pharmaceutical Sciences, Albert-Ludwigs University Freiburg, Freiburg, Germany

<sup>4</sup> Centro de Investigación en Biología Celular y Molecular (CIBCM), Universidad de Costa Rica, San José, Costa Rica

<sup>5</sup> Escuela de Química, Universidad de Costa Rica, San José, Costa Rica

<sup>6</sup> Spemann Graduate School of Biology and Medicine (SGBM), Albert-Ludwigs University Freiburg, Freiburg, Germany

† These authors contributed equally to this work.

‡ authors for correspondence

## Supporting Tables

**Table S1.** Mineralogical composition of PM<sub>2.5</sub><sup>†</sup>

| <b>Component</b>                                                                | <b>percentage<br/>portion<sup>b</sup></b> |
|---------------------------------------------------------------------------------|-------------------------------------------|
| Amorphous                                                                       | 30%                                       |
| Sylvite (KCl)                                                                   | 5%                                        |
| Syngenite (K <sub>2</sub> Ca(SO <sub>4</sub> ) <sub>2</sub> · H <sub>2</sub> O) | 1%                                        |
| Arcanite (K <sub>2</sub> SO <sub>4</sub> )                                      | 47%                                       |
| Thenardite (Na <sub>2</sub> SO <sub>4</sub> )                                   | 2%                                        |
| Merwinite (Ca <sub>3</sub> Mg(SiO <sub>4</sub> ) <sub>2</sub> )                 | 2%                                        |
| Larnite (Ca <sub>2</sub> SO <sub>4</sub> )                                      | 5%                                        |
| Periclase (MgO)                                                                 | 2%                                        |
| Dolomite (CaMg(CO <sub>3</sub> ) <sub>2</sub> )                                 | 1%                                        |
| Portlandite (Ca(OH) <sub>2</sub> )                                              | 2%                                        |
| Lime (CaO)                                                                      | 1%                                        |
| Aragonite (CaCO <sub>3</sub> )                                                  | 2%                                        |

<sup>†</sup> data depicted from Dornhof et al. [1]; values given in wt%

**Table S2.** Concentrations of PAHs ( $\mu\text{g}/\text{kg}$ ) in  $\text{PM}_{2.5}$  from biomass combustion <sup>†</sup>

| PAH                                      | $\mu\text{g}/\text{kg}$ | PAH                                                                   | $\mu\text{g}/\text{kg}$ |
|------------------------------------------|-------------------------|-----------------------------------------------------------------------|-------------------------|
| Acenaphthene                             | 3.64                    | Naphtho[1,2- <i>b</i> ]fluoranthene and Naphtho[2,3- <i>a</i> ]pyrene | 0.93                    |
| Anthracene                               | 7.38                    | Fluorene                                                              | 4.67                    |
| Benzo[ <i>a</i> ]anthracene              | 6.70                    | 1-Methylfluorene                                                      | 1.24                    |
| 9-Methylanthracene                       | 0.23                    | 7H-Benzo[ <i>c</i> ]fluorene                                          | 1.73                    |
| 9,10-Dimethylanthracene                  | <0.50                   | Naphthalene                                                           | 22.57                   |
| 6-Methylbenzo[ <i>a</i> ]anthracene      | 0.84                    | 2-Methylnaphthalene                                                   | 11.44                   |
| 5-Methylbenzo[ <i>a</i> ]anthracene      | <0.50                   | 2,6-Dimethylnaphthalene                                               | 10.63                   |
| 7,12-Dimethylbenzo[ <i>a</i> ]anthracene | 2.27                    | 1,8-Dimethylnaphthalene                                               | 0.17                    |
| Dibenzo[ <i>a,j</i> ]anthracene          | <0.25                   | Phenanthrene                                                          | 36.01                   |
| Dibenzo[ <i>a,c</i> ]anthracene          | <0.25                   | 9-Methylphenanthrene                                                  | 11.52                   |
| Dibenzo[ <i>a,h</i> ]anthracene          | <0.25                   | 1-Methylphenanthrene                                                  | 7.30                    |
| Anthanthrene                             | <2.50                   | Benzo[ <i>c</i> ]phenanthrene                                         | 1.93                    |
| 3-Methylcholanthrene                     | <1.25                   | Pyrene                                                                | 41.98                   |
| Chrysene                                 | 15.27                   | 1-Methylpyrene                                                        | 14.22                   |
| 2-Methylchrysene                         | 1.31                    | Benzo[ <i>e</i> ]pyrene                                               | 12.27                   |
| 6-Methylchrysene                         | 0.12                    | Benzo[ <i>a</i> ]pyrene                                               | 5.29                    |
| 5-Methylchrysene                         | 0.28                    | 6-Methylbenzo[ <i>a</i> ]pyrene                                       | <1.25                   |
| 4-Methylchrysene                         | <0.50                   | Indeno[1,2,3- <i>cd</i> ]pyrene                                       | 3.86                    |
| Coronene                                 | 2.10                    | Naphtho[2,3- <i>e</i> ]pyrene                                         | <0.38                   |
| Fluoranthene                             | 50.67                   | Dibenzo[ <i>a,l</i> ]pyrene                                           | 0.49                    |
| Benzo[ <i>b</i> ]fluoranthene            | 12.23                   | Dibenzo[ <i>a,e</i> ]pyrene                                           | 1.72                    |
| Benzo[ <i>k</i> ]fluoranthene            | 2.74                    | Dibenzo[ <i>a,i</i> ]pyrene                                           | 0.38                    |
| Benzo[ <i>ghi</i> ]fluoranthene          | 10.15                   | Dibenzo[ <i>a,h</i> ]pyrene                                           | <0.50                   |
| Naphtho[1,2- <i>k</i> ]fluoranthene      | <0.38                   | Perylene                                                              | 0.73                    |
| Naphtho[2,3- <i>b</i> ]fluoranthene      | 0.59                    | Benzo[ <i>ghi</i> ]perylene                                           | 2.42                    |
| Dibenzo[ <i>a,e</i> ]fluoranthene        | <0.38                   | Retene                                                                | 33.43                   |
| Naphtho[2,3- <i>k</i> ]fluoranthene      | <0.38                   | Triphenylene                                                          | 6.41                    |

<sup>†</sup> data depicted from Popadic et al. [2]

**Table S3.** Expression of cytokine, chemokine, adhesion molecule, and matrix metalloproteinase genes upon long-term exposure to PM<sub>2.5</sub><sup>†</sup>

| <i>gene symbol</i> | <i>encoded protein</i>                                                   | <i>adjusted<br/>p-value</i> | <i>log2FC</i> | <i>FC</i> |
|--------------------|--------------------------------------------------------------------------|-----------------------------|---------------|-----------|
| <i>CCL2</i>        | chemokine (C-C motif) ligand 2, monocyte<br>chemotactic protein 1 (MCP1) | 0.0043                      | -1.68         | 0.31      |
| <i>CCL5</i>        | chemokine (C-C motif) ligand 5, RANTES                                   | n.s.                        | 0.01          | 1.01      |
| <i>CCL8</i>        | chemokine (C-C motif) ligand 8,<br>monocyte chemotactic protein 2 (MCP2) | n.s.                        | -0.06         | 0.96      |
| <i>CXCL1</i>       | chemokine (C-X-C motif) ligand 1                                         | n.s.                        | 0.02          | 1.01      |
| <i>CXCL10</i>      | chemokine (C-X-C motif) ligand 10                                        | n.s.                        | 0.00          | 1.00      |
| <i>ICAM1</i>       | intracellular adhesion molecule 1                                        | n.s.                        | -0.02         | 0.98      |
| <i>IL12A</i>       | interleukin 12 subunit alpha                                             | n.s.                        | 0.10          | 1.07      |
| <i>IL12B</i>       | interleukin 12 subunit beta                                              | n.s.                        | -0.01         | 0.99      |
| <i>MMP1</i>        | matrix metalloproteinase 1                                               | n.s.                        | 0.20          | 1.14      |
| <i>MMP9</i>        | matrix metalloproteinase 9                                               | n.s.                        | -0.02         | 0.98      |
| <i>MMP12</i>       | matrix metalloproteinase 12                                              | 0.0009                      | -2.69         | 0.16      |
| <i>MMP13</i>       | matrix metalloproteinase 13                                              | 0.0065                      | -1.15         | 0.45      |
| <i>TNF</i>         | tumor necrosis factor, TNFalpha                                          | n.s.                        | -0.05         | 0.97      |
| <i>VCAM1</i>       | vascular cellular adhesion molecule 1                                    | n.s.                        | -0.04         | 0.97      |

<sup>†</sup> according to Affymetrix Human Genome U133 Plus 2.0 gene expression arrays; n.s., not significant.

**Table S4.** Expression of genes, relevant for apoptosis after long-term exposure to PM<sub>2.5</sub><sup>†</sup>

| <i>gene symbol</i>               | <i>encoded protein</i>                                     | <i>adjusted<br/>value</i> | <i>p-<br/>log2FC</i> | <i>FC</i> |
|----------------------------------|------------------------------------------------------------|---------------------------|----------------------|-----------|
| <i>ATG5</i> <sup>‡</sup>         | autophagy related 5                                        | n.s.                      | 0.02                 | 1.01      |
| <i>BAD, BCL2L8</i> <sup>§</sup>  | Bad, BCL2 associated agonist of cell death                 | n.s.                      | 0.03                 | 1.02      |
| <i>BAK1, BCL2L7</i> <sup>§</sup> | Bak, BCL2 antagonist/killer 1                              | n.s.                      | 0.04                 | 1.03      |
| <i>BAX, BCL2L4</i> <sup>§</sup>  | Bax, Bcl-2-associated X protein                            | n.s.                      | 0.04                 | 1.01      |
| <i>BCL2</i> <sup>¶,£</sup>       | Bcl-2, B-cell lymphoma 2                                   | n.s.                      | 0.01                 | 0.99      |
| <i>BCL2L1</i> <sup>¶,£</sup>     | Bcl-xL, BCL2 like 1                                        | n.s.                      | 0.07                 | 1.05      |
| <i>BECN1</i> <sup>‡</sup>        | beclin-1, Zinc finger protein basonuclin-1                 | n.s.                      | -0.01                | 0.99      |
| <i>BID</i> <sup>§</sup>          | Bid, BH3 interacting-domain death agonist                  | n.s.                      | 0.03                 | 1.01      |
| <i>BIM, BCL2L11</i> <sup>§</sup> | Bim, Bcl-2-like protein 11                                 | n.s.                      | 0.01                 | 1.01      |
| <i>BIRC5</i> <sup>¶</sup>        | Surviving                                                  | n.s.                      | -0.03                | 0.98      |
| <i>CFLAR</i> <sup>¶,£</sup>      | c-Flip, caspase 8 and FADD-like apoptosis regulator        | n.s.                      | -0.01                | 0.99      |
| <i>HMGB1</i> <sup>‡</sup>        | high mobility group protein B1                             | n.s.                      | 0.01                 | 1.01      |
| <i>MCL1</i> <sup>¶,£</sup>       | induced myeloid leukemia cell differentiation protein Mcl1 | n.s.                      | 0.03                 | 1.02      |
| <i>XIAP</i> <sup>¶,£</sup>       | XIAP, X-linked inhibitor of apoptosis protein              | n.s.                      | 0.03                 | 1.03      |

<sup>†</sup> according to Affymetrix Human Genome U133 Plus 2.0 gene expression arrays; <sup>‡</sup> involved in autophagy, which inhibits apoptosis; <sup>§</sup> promotes apoptosis; <sup>¶</sup> inhibits apoptosis; <sup>£</sup> transcriptional regulation by Akt/NF- $\kappa$ B; n.s., not significant.

**Table S5.** Expression of ABC transporter genes, relevant for multidrug resistance after long-term exposure to PM<sub>2.5</sub><sup>†</sup>

| <i>gene symbol</i> | <i>encoded protein</i>                                        | <i>adjusted<br/>p-value</i> | <i>log2FC</i> | <i>FC</i> |
|--------------------|---------------------------------------------------------------|-----------------------------|---------------|-----------|
| <i>ABCA2</i>       | ATP-binding cassette sub-family A member 2                    | n.s.                        | -0.01         | 0.99      |
| <i>ABCB1</i>       | P-glycoprotein, P-gp, multi drug resistance protein (MDR)1    | 0.005                       | -1.22         | 0.43      |
| <i>ABCB4</i>       | MDR3                                                          | n.s.                        | -0.03         | 0.98      |
| <i>ABCB11</i>      | BSEP (bile salt export pump), sPgp (sister of P-glycoprotein) | n.s.                        | -0.03         | 0.98      |
| <i>ABCC1</i>       | Multi resistance-associated protein (MRP)1                    | n.s.                        | 0.03          | 1.02      |
| <i>ABCC2</i>       | Multi resistance-associated protein (MRP)2                    | 0.045                       | 0.50          | 1.41      |
| <i>ABCC3</i>       | Canalicular multispecific organic anion transporter 2, MRP3   | n.s.                        | 0.03          | 1.02      |
| <i>ABCC4</i>       | MRP4                                                          | n.s.                        | -0.01         | 0.99      |
| <i>ABCC5</i>       | MRP5                                                          | n.s.                        | -0.03         | 0.98      |
| <i>ABCC6</i>       | MRP6                                                          | n.s.                        | -0.01         | 1.00      |
| <i>ABCC10</i>      | MRP7                                                          | n.s.                        | -0.01         | 0.99      |
| <i>ABCC11</i>      | Multidrug resistance-related protein 8 (MRP8)                 | n.s.                        | -0.01         | 0.99      |
| <i>ABCG2</i>       | ATP-binding cassette super-family G member 2                  | n.s.                        | 0.02          | 1.01      |

<sup>†</sup> according to Affymetrix Human Genome U133 Plus 2.0 gene expression arrays; n.s., not significant.

**Table S6.** Expression of antioxidant redox-sensitive genes upon long-term exposure to PM<sub>2.5</sub><sup>†</sup>

| <i>gene symbol</i>          | <i>encoded protein</i>                                                  | <i>adjusted<br/>value</i> | <i>p-<br/>log2FC</i> | <i>FC</i> |
|-----------------------------|-------------------------------------------------------------------------|---------------------------|----------------------|-----------|
| <i>CAT</i> <sup>§</sup>     | Catalase                                                                | n.s.                      | 0.00                 | 1.00      |
| <i>GPX1</i> <sup>‡,§</sup>  | glutathione peroxidase 1                                                | n.s.                      | 0.01                 | 1.00      |
| <i>GPX2</i> <sup>§</sup>    | glutathione peroxidase 2                                                | n.s.                      | -0.01                | 1.00      |
| <i>GPX3</i> <sup>§</sup>    | glutathione peroxidase 3                                                | n.s.                      | 0.02                 | 1.01      |
| <i>GSR</i>                  | glutathione reductase                                                   | n.s.                      | 0.01                 | 1.00      |
| <i>GSS</i>                  | glutathione synthetase                                                  | n.s.                      | 0.03                 | 1.02      |
| <i>PPARGC1A</i>             | peroxisome proliferator-activated receptor<br>gamma coactivator 1-alpha | n.s.                      | -0.07                | 0.96      |
| <i>PRDX1</i> <sup>‡,§</sup> | peroxiredoxin 1                                                         | n.s.                      | 0.01                 | 1.00      |
| <i>PRDX2</i> <sup>‡,§</sup> | peroxiredoxin 2                                                         | n.s.                      | -0.04                | 0.99      |
| <i>PRDX3</i> <sup>‡,§</sup> | peroxiredoxin 3                                                         | n.s.                      | 0.00                 | 1.00      |
| <i>PRDX4</i> <sup>§</sup>   | peroxiredoxin 4                                                         | n.s.                      | 0.00                 | 1.00      |
| <i>PRDX5</i> <sup>‡,§</sup> | peroxiredoxin 5                                                         | n.s.                      | 0.01                 | 1.00      |
| <i>PRDX6</i> <sup>§</sup>   | peroxiredoxin 6                                                         | n.s.                      | 0.00                 | 1.00      |
| <i>TXN</i> <sup>‡</sup>     | thioredoxin 1                                                           | n.s.                      | 0.04                 | 1.03      |
| <i>TXN2</i>                 | thioredoxin 2                                                           | n.s.                      | -0.01                | 1.00      |
| <i>TXNRD1</i>               | thioredoxin reductase 1                                                 | n.s.                      | 0.04                 | 1.03      |
| <i>TXNRD2</i>               | thioredoxin reductase 2                                                 | n.s.                      | -0.01                | 0.99      |
| <i>SOD1</i> <sup>§</sup>    | superoxide dismutase 1                                                  | n.s.                      | 0.02                 | 1.02      |
| <i>SOD2</i> <sup>‡,§</sup>  | superoxide dismutase 2                                                  | n.s.                      | 0.00                 | 1.00      |
| <i>SOD3</i> <sup>§</sup>    | superoxide dismutase 3                                                  | n.s.                      | 0.00                 | 1.00      |

<sup>†</sup> according to Affymetrix Human Genome U133 Plus 2.0 gene expression arrays; <sup>‡</sup> involved in doxorubicin resistance; <sup>§</sup> involved in H<sub>2</sub>O<sub>2</sub> generation/detoxification; n.s., not significant.



## Supporting Figures

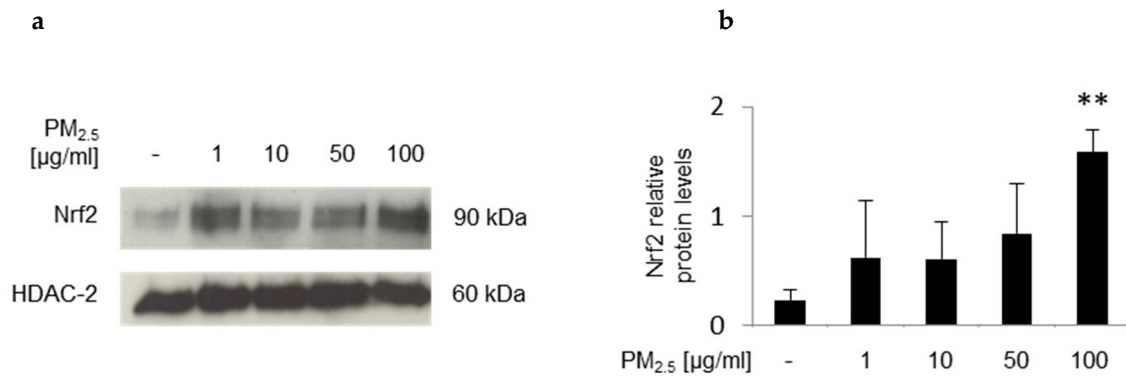

**Figure S1. Long-term exposure to PM<sub>2.5</sub> induces nuclear translocation of Nrf2.** BEAS-2B cells were exposed to 1 - 100 µg/ml PM<sub>2.5</sub> for 12 h. (a), translocated Nrf2 was detected in nuclear extracts by immunoblotting and normalized to histone deacetylase (HDAC)-2. Cells, cultured in the absence of PM<sub>2.5</sub> served as controls (first lane). A representative blot of two different experiments is shown. (b), quantification of immunoblots relative to control. Statistical analysis was performed by using the R statistical software [3] and determined by analysis of variance (ANOVA), followed by Dunnett's post-hoc test. Values are depicted as means and +standard deviations; \*\*, p<0.01.

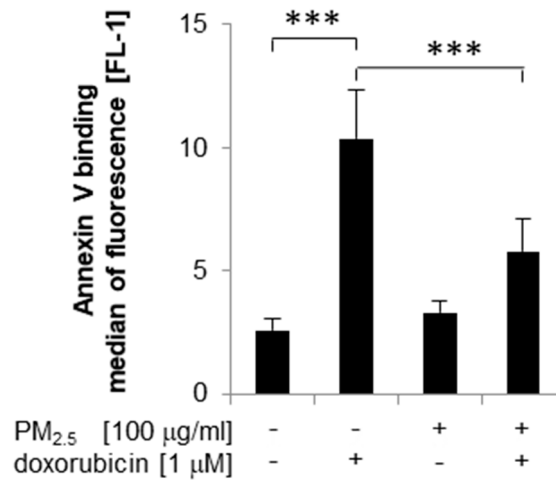

**Figure S2. Cell death resistance to doxorubicin is mediated by PM<sub>2.5</sub>.** BEAS-2B cells were cultured in the presence of 100 µg/ml PM<sub>2.5</sub> for 3 to 5 weeks, before final passage and re-exposure of cells to 100 µg/ml PM<sub>2.5</sub> for 48 h. Doxorubicin (1 µM) was added 24 h after the last addition of PM<sub>2.5</sub>. Equally cultured cells that were never exposed to PM<sub>2.5</sub> served as controls. Detection of apoptosis by Annexin V staining and flow cytometry (n = 4). Statistical analysis was performed by using the R statistical software [3] and determined by analysis of variance (ANOVA), followed by the Tukey's post-hoc test. Values are depicted as means and +standard deviations; \*\*p<0.01; \*\*\*p<0.001.

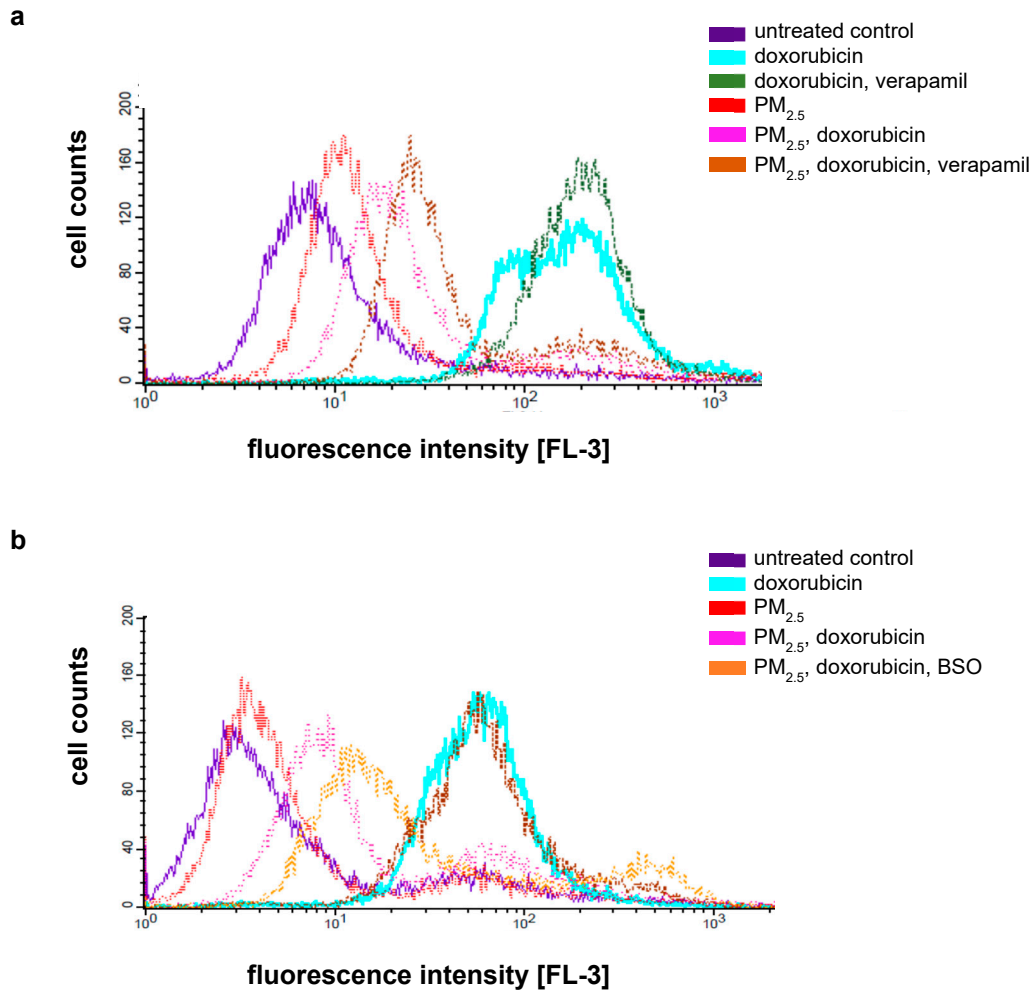

**Figure S3. Acquired chemoresistance in PM<sub>2.5</sub> exposed BEAS-2B cells is mediated by GSH.** BEAS-2B cells were cultured in the presence of 100 μg/ml PM<sub>2.5</sub> for 3 to 5 weeks. After final passage, cells were re-exposed to 100 μg/ml PM<sub>2.5</sub> after 24 h. Verapamil (20 μM) or BSO (200 μM) were added 1 h prior to the last PM<sub>2.5</sub> exposure. Doxorubicin (1 μM) was added 24 h after the last PM<sub>2.5</sub> exposure for an additional 48 h. Cells that were never exposed to PM<sub>2.5</sub> served as controls. Intracellular doxorubicin content was determined by flow cytometry and is depicted as histograms. (a), inhibition of P-gp/MDR1 by verapamil; (b), inhibition of GSH synthesis by BSO.

## References

1. Dornhof R, Maschowski C, Osipova A, Giere R, Seidl M, Merfort I, et al. Stress fibers, autophagy and necrosis by persistent exposure to PM2.5 from biomass combustion. *PLoS One*. 2017;12(7):e0180291. doi: 10.1371/journal.pone.0180291. PubMed PMID: 28671960; PubMed Central PMCID: PMC5495337.
2. Popadic D, Hesselbach K, Richter-Brockmann S, Kim GJ, Flemming S, Schmidt-Heck W, et al. Gene expression profiling of human bronchial epithelial cells exposed to fine particulate matter (PM2.5) from biomass combustion. *Toxicol Appl Pharmacol*. 2018;347:10-22. doi: 10.1016/j.taap.2018.03.024. PubMed PMID: 29596927.
3. R Core Team (2019). R: A language and environment for statistical computing. R Foundation for Statistical Computing, Vienna, Austria. URL <https://www.R-project.org/>
